1       **TREM2-H157Y Increases Soluble TREM2 Production and Reduces Amyloid Pathology**

2       Wenhui Qiao<sup>1</sup>, Yixing Chen<sup>1</sup>, Yuka A. Martens<sup>1</sup>, Chia-Chen Liu<sup>1</sup>, Joshua Knight<sup>1</sup>, Fuyao Li<sup>1</sup>,  
3       Kai Chen<sup>1</sup>, Kurti Aishe<sup>1</sup>, Francis Shue<sup>1</sup>, Maxwell V. Dacquel<sup>1</sup>, John Fryer<sup>2</sup>, Na Zhao<sup>1\*</sup>, Guojun  
4       Bu<sup>1,3\*</sup>

5       <sup>1</sup>Department of Neuroscience, Mayo Clinic, Jacksonville, FL, 32224, USA

6       <sup>2</sup>Department of Neuroscience, Mayo Clinic, Scottsdale, AZ, 85259, USA.

7       <sup>3</sup>Lead contact

8       \*Correspondence: [zhao.na@mayo.edu](mailto:zhao.na@mayo.edu) and [bu.guojun@mayo.edu](mailto:bu.guojun@mayo.edu)

9       **Key words:** A $\beta$  clearance/ Amyloid pathology/ Microglia/ Soluble TREM2/ *Trem2* H157Y  
10       mutation

11       **Total Character count (no space):** 48,855

12       **Total Character count (with space):** 57,922

13

14

15

16

17

18

19

20

21

22

23

24

25 **Abstract**

26 The p.H157Y variant of *TREM2* (Triggering Receptor Expressed on Myeloid Cells 2) has been  
27 reported to increase Alzheimer's disease (AD) risk. This mutation in the extracellular domain of  
28 *TREM2* localizes at the cleavage site, leading to enhanced shedding. Here, we generated a novel  
29 *Trem2* H157Y knock-in mouse model to investigate how this H157Y mutation impacts *TREM2*  
30 proteolytic processing, synaptic function, and AD-related amyloid pathology. Consistent with  
31 previous *in vitro* findings, *TREM2*-H157Y increases the amount of soluble *TREM2* (s*TREM2*)  
32 in the cortex and serum of mutant mice compared to the wild type controls. Interestingly, the  
33 *Trem2* H157Y variant enhances synaptic plasticity without affecting microglial density and  
34 morphology. In the presence of amyloid pathology, *TREM2*-H157Y surprisingly accelerates A $\beta$   
35 clearance and reduces amyloid burden and microgliosis. Taken together, our findings support a  
36 beneficial effect of the *Trem2* H157Y mutation in synaptic function and in mitigating amyloid  
37 pathology. Considering the genetic association of *TREM2* p.H157Y with AD, we speculate  
38 *TREM2*-H157Y might increase AD risk through an amyloid-independent pathway, as such its  
39 effects on tauopathy and neurodegeneration merit further investigation.

40

41

42

43

44

45

46

47

## 48 **Introduction**

49 Alzheimer's disease (AD) is a chronic neurodegenerative disease characterized by the  
50 pathological deposition of extracellular amyloid plaques and intraneuronal hyperphosphorylated  
51 tau tangles, as well as a prominent microglia activation responding to neuropathology and  
52 neurodegeneration (DeTure & Dickson, 2019, Guo, Zhang et al., 2020, Querfurth & LaFerla,  
53 2010). Rare variants of multiple microglia genes are found to be associated with AD risk  
54 (Sims van der Lee et al., 2017), including Triggering Receptor Expressed on Myeloid Cells 2  
55 (*TREM2*). In particular, the *TREM2* p.H157Y variant was identified from a relatively small  
56 number of carriers and conferred an increased AD risk with an odds ratio (OR) of 11.01 (MAF,  
57 0.4%) in a Han Chinese cohort (Jiang, Tan et al., 2016), whereas in a Caucasian cohort used in  
58 the Alzheimer's Disease Sequencing Project, the OR was 4.7 (MAF, 0.06%) (Song, Hooli et al.,  
59 2017). However, how this rare *TREM2* variant impacts its function as it relates to AD risk is not  
60 clear.

61 *TREM2* is an immunoreceptor exclusively expressed in microglia in the central nervous  
62 system and in myeloid cells (e.g., macrophage) in the periphery (Ulland & Colonna, 2018).  
63 Structurally, it consists of an Ig-like V type domain, stalk region, a transmembrane domain, and  
64 a short cytoplasmic tail (Kober, Alexander-Brett et al., 2016). Most AD-risk variants (e.g.,  
65 p.R47H, p.R62H) of *TREM2* (Benitez, Cruchaga et al., 2013, Guerreiro, Wojtas et al., 2013,  
66 Jonsson & Stefansson, 2013) are located in exon2 which encodes an Ig-like domain. These  
67 pathogenic mutations often lead to ineffective binding of ligands such as A $\beta$  oligomers (Vilalta,  
68 Zhou et al., 2021, Zhao, Wu et al., 2018, Zhong, Wang et al., 2018), fibrillar A $\beta$ -associated  
69 anionic lipids (Wang, Cella et al., 2015), LDL (Song et al., 2017, Yeh, Wang et al., 2016), HDL

70 (Song et al., 2017), and apolipoproteins (Atagi, Liu et al., 2015, Yeh et al., 2016). These  
71 impairments are further associated with microglial dysfunction in phagocytosis *in vitro*  
72 (Kleinberger, Yamanishi et al., 2014, Yeh et al., 2016, Yin, Liu et al., 2016) and amyloid  
73 plaques engulfment *in vivo* (Song, Joshita et al., 2018, Yuan, Condello et al., 2016). In contrast,  
74 the p.H157Y variant is located in exon3, encoding the stalk region. Intriguingly, the H157-S158  
75 site was identified as the ADAM10/17 cleavage site that produces soluble TREM2 (sTREM2)  
76 where the H157Y mutant enhances this shedding (Feuerbach, Schindler et al., 2017, Schlepckow,  
77 Kleinberger et al., 2017, Thornton, Sevalle et al., 2017). Ectopic TREM2-H157Y expression in  
78 the HEK293 cells increases sTREM2 in conditioned medium accompanied by reduced  
79 membrane-associated mature full-length TREM2 (Schlepckow et al., 2017, Thornton et al.,  
80 2017). The increased TREM2 shedding might be related to impaired phagocytosis of pHrodo-  
81 E.Coli in HEK293 cells (Schlepckow et al., 2017) and decreased TREM2 signaling activation in  
82 response to phosphatidylserine in 2B4 T cells (Song et al., 2017). Despite these *in vitro*  
83 observations, the AD-related outcomes of *TREM2* H157Y mutation *in vivo* remain unknown.

84 Towards this, we generated a novel *Trem2* H157Y knock-in mouse model through  
85 CRISPR-cas9 technology. We found that TREM2-H157Y increased sTREM2 production.  
86 Moreover, TREM2-H157Y enhanced synaptic plasticity but did not affect microglial number and  
87 morphology. In the presence of amyloid pathology, TREM2-H157Y reduced amyloid burden,  
88 toxic A $\beta$  oligomer, and microgliosis. Our results imply that the TREM2-H157Y might be  
89 beneficial to brain function and in reducing amyloid pathology and related toxicity.

90

## 91 **Results**

### 92 **Generation of *Trem2* H157Y knock-in mouse model**

93 TREM2-H157 is located where TREM2 undergoes shedding to produce sTREM2 (Fig 1A)  
94 (Feuerbach et al., 2017, Schlepckow et al., 2017, Thornton et al., 2017). To study the *in vivo*  
95 effects of the *Trem2* H157Y mutation, we introduced a C>T substitution in exon3 through  
96 CRISPR/Cas9 technology to create the missense H157Y mutation (Fig 1B). Two founders (1<sup>#</sup>  
97 and 2<sup>#</sup>) were obtained with no off-target mutation observed in the offspring of either founder  
98 (Fig EV1A and B). Results reported below were generated using the offspring of Founder 1<sup>#</sup>  
99 unless otherwise stated. By crossing the *Trem2* H157Y heterozygous mice, we obtained three  
100 genotypes: wild type (*Trem2*<sup>+/+</sup>, referred to as WT), heterozygous (*Trem2*<sup>+/H157Y</sup>, referred to as  
101 Het), and homozygous (*Trem2*<sup>H157Y/H157Y</sup>, referred to as Hom). Littermates of the three genotypes  
102 were used to investigate the impact of the *Trem2* H157Y mutation.

103

#### 104 **TREM2-H157Y increases the production of sTREM2**

105 At the transcription level, there was no significant change of cortical *Trem2* mRNA level in  
106 *Trem2* H157Y Het or Hom mice compared to WT mice at 6 months of age (Fig. 1C) compared  
107 to the WT mice. To evaluate TREM2 protein levels, proteins were sequentially extracted from  
108 cortex with Tris-buffered saline (TBS) and TBSX (TBS+1% Triton X-100) and analyzed by N-  
109 terminal TREM2-capturing ELISA. Although membrane bound TREM2 in TBSX did not differ  
110 between genotypes (Fig. 1E), there was an increase of sTREM2 in the TBS lysates in Hom  
111 compared to Het and WT mice (Fig. 1D).

112 To further examine TREM2 processing in microglia, we cultured cortical primary  
113 microglia from Het breeder littermate pups. Consistent with *in vivo* findings, we observed an  
114 increase of sTREM2 in conditioned medium (CM) from Hom microglia compared to Het and  
115 WT microglia (Fig 1F). The membrane associated TREM2 in microglia RIPA lysates did not

116 differ between genotypes (Fig 1G). Further supporting an increase of sTREM2 production by the  
117 *Trem2* H157Y mutation, we observed higher levels of serum sTREM2 in Hom mice compared to  
118 WT and Het mice (Fig. 1H). Together, our results support an effect of the *Trem2* H157Y  
119 mutation on increasing sTREM2 production in homozygous mice which are consistent with prior  
120 *in vitro* findings (Schlepckow et al., 2017, Thornton et al., 2017).

121

### 122 **TREM2-H157Y does not affect microglia density and morphology**

123 To quantify the microglia density and assess the morphology of microglia, we performed IBA1  
124 immunofluorescence staining of brain slices from *Trem2* H157Y knock-in mice at 6 months of  
125 age. Microglia density and cell body size did not change with the *Trem2* H157Y mutation (Fig  
126 EV2A-C). Analyses after microglia skeletonization (EV2D-F) showed no significant differences  
127 in the branch number, junction number, or total branch length per microglia between genotypes  
128 (EV2G-I). These results suggest TREM2-H157Y does not affect microglia density and  
129 morphology *in vivo* under physiological conditions.

130

### 131 **TREM2-H157Y enhances synaptic plasticity**

132 It has been reported that microglia play important roles in synaptic pruning and neural circuit  
133 regulation (Filipello, Morini et al., 2018). Thus, we assessed whether the *Trem2* H157Y mutation  
134 affects synaptic plasticity. We performed hippocampal long-term potentiation (LTP) in WT and  
135 Hom mice at 6 months of age. While the basic transmission and presynaptic facilitation were  
136 unaffected (Fig 2A and B), we observed an enhanced LTP in the Hom mice compared to WT  
137 mice (Fig 2C and D).

138 To examine whether this strengthened synaptic capability is correlated with enhanced  
139 cognitive performance, we conducted a battery of behavioral tests with *Trem2* H157Y knock-in  
140 mice. We did not observe significant performance differences in anxiety (Fig EV3A) and  
141 associative memory assessments (Fig EV3C and D) between genotypes. However, using Y-maze  
142 spontaneous tests, we observed a trending performance improvement of spatial working memory  
143 in Hom mice compared to Het mice while no difference between Het mice and WT mice (Fig  
144 EV3B; Het vs Hom,  $p = 0.06$ ). These results together support a beneficial effect of TREM2-  
145 H157Y on synaptic plasticity, even though it did not translate into significant enhancement at the  
146 behavioral level.

147

#### 148 **TREM2-H157Y reduces amyloid burden in 5xFAD mice**

149 To investigate the effects of H157Y mutation on AD-related amyloid pathogenesis, *Trem2*  
150 H157Y knock-in mice were crossed with 5xFAD amyloid model mice to generate littermates  
151 with three genotypes, 5xFAD/WT (*5xFAD; Trem2*<sup>+/+</sup>), 5xFAD/Het (*5xFAD; Trem2*<sup>+/H157Y</sup>), and  
152 5xFAD/Hom (*5xFAD; Trem2*<sup>H157Y/H157Y</sup>). Animals were harvested at 8.5 months of age to assess  
153 amyloid pathology at a middle-to-late stage of amyloid development in the cortex (Jay, Hirsch et  
154 al., 2017).

155 Total A $\beta$  immunostaining with MOAB2 antibody revealed significant reductions plaque  
156 number (Fig 3A and B) in 5xFAD/Hom mice compared to 5xFAD/WT mice. Plaques from all  
157 three genotypes were found to be similar in size (Fig 3C). We did not observe significant  
158 decreases of the X34-positive fibrillar A $\beta$  signal with the *Trem2* H157Y mutation (Fig EV4A-C).  
159 Moreover, we detected A $\beta$ 40 and A $\beta$ 42 by ELISA in cortical lysates obtained through sequential  
160 TBS, TBSX, and guanidine (GND) extraction. Consistent with the reduction of total A $\beta$  in

161 staining, we observed significant reductions of A $\beta$ 40 and A $\beta$ 42 in GND lysates (Fig 3D and E)  
162 from 5xFAD/Hom mice compared with 5xFAD/WT mice. The 5xFAD/Het group exhibited no  
163 significant differences compared to 5xFAD/Hom and 5xFAD/WT groups (Fig 3D and E). We  
164 did not observe a significant decrease of A $\beta$ 40 and A $\beta$ 42 in both TBS and TBSX lysates with the  
165 *Trem2* H157Y mutation (Fig EV4D-G).

166 To confirm TREM2-H157Y effects on amyloid burden, we crossed 5xFAD mice with  
167 our second founder of the *Trem2* H157Y knock-in mice (Founder 2<sup>#</sup>). Consistent with the results  
168 from the Founder 1<sup>#</sup> offspring, we observed significant reductions of A $\beta$ 40 and A $\beta$ 42 levels in  
169 GND lysates from 5xFAD/Hom mice compared to 5xFAD/WT (Fig 3F and G). Also,  
170 5xFAD/Hom group showed trending decreases compared 5xFAD/Het group (Fig 3F and G;  
171 A $\beta$ 40, Het vs Hom, p=0.08; A $\beta$ 42, Het vs Hom, p=0.05). In this cohort, both TBS-A $\beta$ 40 and  
172 TBS-A $\beta$ 42 in 5xFAD/Hom mice reduced significantly compared to 5xFAD/WT and trended  
173 toward reductions compared to 5xFAD/Het mice (Fig EV4H and J; A $\beta$ 40, Het vs Hom, p=0.05;  
174 A $\beta$ 42, Het vs Hom, p=0.05). TBSX-A $\beta$ 40 was significantly reduced in 5xFAD/Het mice and  
175 trended toward a reduction in 5xFAD/Hom mice compared to 5xFAD/WT mice (Fig EV4I; WT  
176 vs Hom, p=0.07). No significant reductions of TBSX-A $\beta$ 42 were observed with the *Trem2*  
177 H157Y mutation (Fig EV4K).

178 We further measured the levels of A $\beta$  oligomers, the neuronal toxic species (Walsh,  
179 Klyubin et al., 2002, Wei, Nguyen et al., 2010) in TBS and TBSX fractions, and found  
180 significant reductions in 5xFAD/Hom mice compared to 5xFAD/WT mice (Fig 3H and I). There  
181 were no significant differences between the 5xFAD/Het group and the other two groups (Fig 3H  
182 and I). We then examined A $\beta$  toxicity-related dystrophic neurites through lysosome-associated  
183 membrane protein (LAMP1) immunostaining. We did not observe significant changes in



184 LAMP1 signal with the *Trem2* H157Y mutation (Fig EV4L and M). Taken together, the *Trem2*  
185 H157Y mutation reduced insoluble A $\beta$  levels and total amyloid burden in homozygous mice.

186

### 187 **TREM2-H157Y facilitates A $\beta$ clearance in 5xFAD mice**

188 To address the potential mechanism of amyloid reduction in the *Trem2* H157Y mice, we  
189 examined the APP processing products (Chen, Xu et al., 2017) and found no significant changes  
190 in the levels of sAPP $\alpha$ , sAPP $\beta$ , and CTF $\beta$  between groups (Fig EV5A-C), suggesting unaltered  
191 A $\beta$  production. We then conducted *in vivo* microdialysis with awake, free-moving mice at 3  
192 months of age (Cirrito, May et al., 2003, Liu, Zhao et al., 2017) to analyze A $\beta$ 42 clearance in the  
193 interstitial fluid (ISF) while A $\beta$  production was inhibited with  $\gamma$ -secretase inhibitor, LY411575  
194 (Fig 4A). The elimination kinetic analysis showed enhanced clearance of A $\beta$ 42 with decreased  
195 A $\beta$ 42 levels four hours post drug administration (Fig 4B) and a 50% reduction of A $\beta$ 42 half-life  
196 (Fig 4C) in 5xFAD/Hom mice compared to 5xFAD/WT mice.

197

### 198 **TREM2-H157Y reduces microgliosis in 5xFAD mice**

199 To assess the microglial responses to amyloid pathology with TREM2-H157Y, we performed  
200 immunostaining of IBA1 and the phagocytic marker CD68 in cortical brain slices from mice at  
201 8.5 months of age. A significant reduction of microgliosis was observed with both IBA1 (Fig 5A  
202 and B) and CD68 (Fig 5D and E) signals in 5xFAD/Hom mice compared to 5xFAD/WT. The  
203 5xFAD/Het group showed no significant differences compared to 5xFAD/WT group and  
204 5xFAD/Hom mice. We further found positive correlation between either IBA1 or CD68 signals  
205 and A $\beta$ 42 in GND lysates, suggesting that the decreased microgliosis is likely due to a reduction  
206 in amyloid load in mice with the *Trem2* H157Y mutation (Fig 5C and F).

207           Plaque-associated microglia have been identified as a critical pathological event in  
208 response to amyloid (DeTure & Dickson, 2019). We found that the number of microglia  
209 associated with amyloid plaques (Fig 5G and H) and plaque area coverage by microglia (Fig 5I)  
210 were significantly reduced in 5xFAD/Hom mice compared to 5xFAD/WT mice. Plaque size did  
211 not differ between 5xFAD/Hom and 5xFAD/WT mice (Fig 5J). Overall, we observed reduced  
212 microgliosis in 5xFAD mice with the *Trem2* H157Y mutation.

213

## 214 **Discussion**

215 In this study, we provided *in vivo* evidence that TREM2-H157Y promotes TREM2 shedding in  
216 our novel *Trem2* H157Y knock-in mouse models. Moreover, we found TREM2-H157Y  
217 enhances synaptic plasticity, facilitates A $\beta$  clearance, and reduces amyloid burden.

218           Consistent with previous *in vitro* findings (Schlepckow et al., 2017, Thornton et al.,  
219 2017), we observed significantly higher sTREM2 level in cortical TBS lysate, conditioned  
220 medium of primary microglia, and peripheral serum from mice with the *Trem2* H157Y mutation.  
221 We did not observe significant changes in membrane associated full-length TREM2. Since N-  
222 terminal TREM2 ELISA does not distinguish mature and immature full length TREM2, we  
223 cannot conclude that TREM2-H157Y specifically reduces mature TREM2 in our mouse model  
224 as described in the *in vitro* studies (Schlepckow et al., 2017, Thornton et al., 2017) .

225           *Trem2* p.R47H and p.Y38C variants impair synaptic plasticity through a loss of TREM2  
226 function (Jadhav, Lin et al., 2020, Ren, Yao et al., 2020). In contrast, we observed enhanced  
227 synaptic plasticity in *Trem2* H157Y knock-in mice implying there might be a different  
228 mechanism by which TREM2-H157Y affects brain functions compared to other variants such as  
229 p.R47H or p.Y38C. Considering the increased sTrem2 in our *Trem2* H157Y mice, we speculate

230 that the enhancement of synaptic plasticity may be due to the increased levels of sTREM2. Such  
231 a mechanism would be consistent with previous findings that exogenous sTREM2 enhances LTP  
232 in an amyloid mouse model (Zhong, Xu et al., 2019). Additionally, it has been reported that  
233 sTrem2 is associated with neurons (Song et al., 2018) further implicating sTREM2 may affect  
234 synaptic function. However, elucidating the roles of TREM2 and sTREM2 in regulating neuronal  
235 activity needs more comprehensive studies.

236 The mechanism by which TREM2-H157Y facilitates A $\beta$  clearance and lowers amyloid  
237 burden is not well understood. However, we speculate that this might link to the interaction  
238 between sTREM2 and A $\beta$ . It has been shown that the A $\beta$  oligomer can bind to TREM2 or  
239 sTREM2 (Lessard, Malnik et al., 2018, Vilalta et al., 2021, Zhao et al., 2018, Zhong et al., 2018).  
240 Also, A $\beta$  oligomers stimulate sTREM2 production in a dose-dependent manner *in vitro* and  
241 sTREM2 in return inhibits A $\beta$  aggregation (Vilalta et al., 2021), suggesting that sTREM2 could  
242 facilitate A $\beta$  diffusion and clearance *in vivo*. Studies have shown that elevating sTREM2 through  
243 exogenous administration or AAV-mediated overexpression significantly reduces amyloid  
244 burden (Zhong et al., 2019). Depleting microglia abolishes the rescuing effect of sTREM2,  
245 suggesting that sTREM2 may reduce amyloid load through microglial activation (Zhong et al.,  
246 2019). Thus, in our mouse models, increased sTREM2 by TREM2-H157Y may accelerate A $\beta$   
247 clearance and/or microglia activation, leading to the overall decrease of amyloid burden and  
248 related microgliosis. Microgliosis reduction may also slow down amyloid progression since  
249 phagocytic microglia with A $\beta$  aggregates may serve as a source of seeding for amyloid plaques  
250 (Fuhrmann, Bittner et al., 2010).

251 Studies on *Trem2* p.R47H reveal a loss of TREM2 function in ligand binding, signaling,  
252 and microglial responses to pathological cues (Song et al., 2017, Song et al., 2018), which

253 inspired the development of TREM2 activating antibodies to alleviate AD pathology. TREM2  
254 antibody administration in amyloid mouse models has been found to boost microglial responses  
255 to A $\beta$ , reduce amyloid load, toxicity, and behavioral impairments (Cheng, Danao et al., 2018,  
256 Fassler, Rappaport et al., 2021, Schlepckow, Monroe et al., 2020, Wang, Mustafa et al., 2020).  
257 While TREM2 activating antibodies stabilize the membrane form of TREM2 and related  
258 signaling, the levels of sTREM2 in serum and CSF decrease accordingly in a dose dependent  
259 manner in mice and humans (Fassler et al., 2021, Schlepckow et al., 2020, Wang et al., 2020).  
260 These findings emphasize the critical role of membrane bound TREM2 in cell-autonomous  
261 microglia activation and phagocytosis to reduce amyloid pathology. Using *Trem2* H157Y knock-  
262 in mouse models, our data alternatively suggests non-cell autonomous benefits of sTREM2 on  
263 neuronal function and A $\beta$  clearance, encouraging a consideration of increasing sTREM2 as a  
264 potential therapeutic strategy to treat AD. Combination therapy by activating TREM2 signaling  
265 and elevating sTREM2 level should also be considered.

266 In summary, our study confirmed increased shedding of TREM2-H157Y *in vivo* and  
267 defined beneficial effects of TREM2-H157Y in brain function and in reducing amyloid  
268 pathology. However, these findings conflict with the genetic studies showing the increased AD  
269 risk associated with *TREM2* p.H157Y. Considering that no animal model fully mimics the AD  
270 related pathologies and 5xFAD mice merely develop amyloid pathology which recapitulates the  
271 very early stage of AD (McDade, Llibre-Guerra et al., 2021), our current data cannot address  
272 how *TREM2* p.H157Y affects late stage AD pathologies including tauopathy and  
273 neurodegeneration. Thus, more investigations are necessary to further elucidate the effect of  
274 *TREM2* H157Y mutation on AD pathogenic events, in particular the tau pathology and related  
275 neurodegeneration.

276

## 277 **Materials and Methods**

### 278 **Generation, genotyping, and off-target analysis of *Trem2* H157Y knock-in mice**

279 *Trem2* H157Y knock-in mice were generated via CRISPR/Cas9 by the Hope Center Transgenic  
280 Vectors Core of the Washington University (Ran, Hsu et al., 2013). CRISPR gRNAs for *in vitro*  
281 testing were identified using CRISPOR (<http://crispor.tefor.net/>) and synthesized as gBlocks  
282 (IDT) with the sequence 5'GGAGGTGCTGTgTTCCAATT3'. *In vitro* target specific gRNA  
283 cleavage activity was validated by transfecting N2A cells with PCR amplified gRNA gblock and  
284 Cas9 plasmid DNA (px330, addgene) using ROCHE Xtremegene HP. Cell pools were harvested  
285 48 hours later for genomic DNA prep, followed by sanger sequencing of PCR products spanning  
286 the gRNA/Cas9 cleavage site, and TIDE analysis (<https://tide.nki.nl/>) of sequence trace files.  
287 CRISPR sgRNA (IDT, 20 ng/ul) and Cas9 (IDT, 50ng/ul) proteins were complexed to generate  
288 the ribonucleoprotein (RNP) for injection along with a 200 nucleotide ssODN donor DNA  
289 (synthesized by IDT, 20 ng/ul), 5'tatatcttgctctttgctgatctgtttgccctgggacctccatccgcagtcactgccagggg  
290 gtctaagaaggaccactactgtacCTGGAGGTGCTGTaTTCCAATTGGGCACCCTCGAAACTCGAT  
291 GACTCCTCGGGGACCCAGAGATCTCCAGCATCTTGGTCATCTAGAGGGTctgtaatagacaa  
292 accatgagg3'. All animal experiments were approved by institutional IACUC protocols. B6/CBA  
293 F1 mice at 3-4 weeks of age (JAX Laboratories, Bar Harbor ME, USA) were superovulated by  
294 intraperitoneal injection of 5 IU pregnant mare serum gonadotropin, followed 48 hours later by  
295 intraperitoneal injection of 5 IU human chorionic gonadotropin (PMS from SIGMA, HGC from  
296 Millipore USA). Mouse zygotes were obtained by breeding B6/CBA stud males with  
297 superovulated B6/CBA females at a 1:1 ratio. One-cell fertilized embryos were injected into the  
298 pronucleus and cytoplasm of each zygote. Microinjections and mouse transgenesis experiments

299 were performed as described previously (Behringer, Gertsenstein et al., 2014, Pease & Saunders,  
300 2011). Founder genotyping was through deep sequencing (MiSeq, Illumina). Mosaic founders  
301 were crossed to WT to generate heterozygous F1 offspring, which were also deep sequenced to  
302 confirm correctly targeted alleles. *Trem2* H157Y mice were genotyped by qPCR with Custom  
303 TaqMan SNP Genotyping assays (Thermo Fisher).

304

305 To exclude introduction of unexpected mutation, we performed off-target analysis with  
306 two heterozygous F1 mice from each of the two founders (1<sup>#</sup> and 2<sup>#</sup>) using the online tool  
307 CRISPOR (<http://crispor.tefor.net/>) (Haeussler, Schonig et al., 2016). Three putative sites with  
308 top CFD scores above 0.3 were identified and examined by Sanger sequencing (GENEWIZ) of  
309 PCR amplification products using extracted genomic DNA.

310 Our mice were housed in a temperature-controlled environment with a 12-h light–dark  
311 cycle and free access to food and water. All animal procedures were approved by the Mayo  
312 Clinic Institutional Animal Care and Use Committee (IACUC) and in accordance with the  
313 National Institutes of Health Guidelines for the Care and Use of Laboratory Animals.

314

### 315 **Introduction of *Trem2* H157Y mutation to 5xFAD amyloid mouse model**

316 *Trem2* H157Y homozygous mice ( $Trem2^{H157Y/H157Y}$ ) were crossed with 5xFAD mice (The  
317 Jackson Laboratory, stock # 34840) to obtain the 5xFAD;  $Trem2^{H157Y/+}$  offspring. 5xFAD;  
318  $Trem2^{H157Y/+}$  mice were used to setup breeding cages to establish the littermate cohorts with three  
319 genotypes including 5xFAD;  $Trem2^{+/+}$ , 5xFAD;  $Trem2^{H157Y/+}$ , 5xFAD;  $Trem2^{H157Y/H157Y}$ .

320

### 321 **Tissue preparation for immunofluorescence staining or biochemical analyses**

322 Blood samples were collected from mice vena cava after isoflurane induced deep anesthesia and  
323 stored at 4°C overnight and subsequently centrifuged at 1000 g for 10 min to collect the  
324 supernatant as serum. Mice were transcardinally perfused with 0.01M PBS and the brains were  
325 dissected out. Half of the brain was fixed in 4% paraformaldehyde (PFA, Fisher Scientific) for  
326 24 hours followed by dehydration with 30% sucrose (Sigma) for 48 hours. Finally, one  
327 hemisphere was embedded in O.C.T. compound (SAKURA) and snap-frozen in liquid nitrogen  
328 before cryostat sectioning. The other hemisphere was dissected into cortex, hippocampus,  
329 midbrain, and cerebellum which were snap-frozen in liquid nitrogen and stored at -80°C. The  
330 cortices were then pulverized and divided into 20-30 mg for RNA extraction and 55-65 mg for  
331 protein extraction.

332 Cortical proteins were extracted sequentially with different lysis buffers. Cortical powder was  
333 homogenized in Tris-buffered saline (TBS, Fisher Bioreagents, BP2471-500) supplemented with  
334 protease inhibitor (cOmplete, Roche) and phosphatase inhibitor (PhosSTOP, Roche) and  
335 subjected to ultracentrifugation at 100,000 g for 1 hour at 4°C. The supernatant was collected as  
336 TBS lysate. The pellets were then resuspended in TBSX (TBS plus 1% Triton-X100)  
337 supplemented with protease inhibitor and phosphatase inhibitor followed by mild agitation at  
338 4°C for 30 min and centrifuged at 100,000 g at 4°C for 1 hour. Supernatant was collected as  
339 TBSX lysate. For amyloid bearing mice, the pellet was further resuspended in 5 M guanidine  
340 hydrochloride (GND, Sigma) followed by sonication and centrifuged at 100,000 g for 1 hour at  
341 4°C. The supernatant was collected as GND lysate. Total protein concentration in each lysate  
342 was measured (Pierce™ BCA Protein Assay Kit, Cat# 23225) before transferring to 96-well  
343 storage plates or 1.5 ml tubes and stored at -80°C until further analysis.

344

### 345 **Immunofluorescence staining, X34 stain and quantification**

346 Embedded hemispheres were coronally sectioned at a 40  $\mu\text{m}$  thickness. Referencing the mouse  
347 brain atlas (Paxinos & Franklin, 2013), sections located from AP -1.7 mm to AP -2.06 mm were  
348 selected for the following procedures. First, brain slices were blocked in blocking buffer (5%  
349 goat serum plus 0.25% Triton in PBS) for 1 hour at room temperature (RT), then incubated  
350 overnight in primary antibody solution at 4°C. Slices were then incubated in the Alexa Fluor-  
351 conjugated secondary antibodies solution (1:1000, Invitrogen) at RT for 2 hours. The primary  
352 antibodies used in this paper include anti-IBA1 (Wako, 019-19741, 1:1000), anti-A $\beta$  (MOAB2,  
353 Abcam, ab126649, 1:1000), anti-LAMP1 (Abcam, ab25245, 1:500), and anti-CD68 (Bio-Rad,  
354 MCA1957,1:500). Fibrillar A $\beta$  plaque staining used free-floating sections from 5xFAD mouse  
355 cohorts. Sections were permeabilized with 0.25% Triton X-100 in PBS and stained with 10  $\mu\text{M}$   
356 X-34 (Sigma, SML1953) in a mixture of 40% ethanol and 0.02M NaOH in PBS as described  
357 (Ulrich, Ulland et al., 2018). To assess the plaque associated microglia, IBA1 stain was  
358 performed after the X34 stain. To quantify signals of A $\beta$ , X34, IBA1, LAMP1 and CD68,  
359 images were taken, stitched using Keyence (BZ-X800) at 20X for the whole slice and analyzed  
360 in batch by customized macro coding in Image J with the same setting parameters for all the  
361 groups. For X34 and IBA1 co-stain, 30-40 images were taken under Confocal (Zeiss) at 40X  
362 with a 0.6 zoom. The number of microglia surrounding plaques within the radius of 30  $\mu\text{m}$  were  
363 manually counted. Colocalization of IBA1-and X34 was measured for each plaque in a batch-  
364 analysis mode of Image J with customized macro coding. Researchers were blinded to genotypes  
365 and groups when performing and quantifying the immunofluorescence staining.

366

### 367 **Primary microglia culture**



368 Cortical cells from pups (p1-p3) were isolated, filtered with 100  $\mu$ m cell strainers (Falcon,  
369 352360), and plated in T75 flasks (Genesee, 25-209) with high-glucose DMEM medium (Gibco,  
370 11965084) containing 10% Fetal Bovine Serum (FBS). Medium was changed to medium  
371 containing 25 ng/mL recombinant mouse GM-CSF (Gemini Bio, 300-308P) the next day. Tails  
372 from each pup were kept for genotyping. Five days after cell plating, medium in each flask was  
373 replaced with fresh GM-CSF-containing medium. On day 9 or 10, microglia were collected by  
374 shaking the flasks at 200-220 rpm at RT for ~20 min, resuspended in non-GM-CSF containing  
375 medium, and plated into 6-well plates. After 24 hours, medium from each well was collected as  
376 conditioned medium. Cells were lysed with RIPA buffer (Millipore, 20-188) supplemented with  
377 protease inhibitor (cOmplete, Roche) and phosphatase inhibitor (PhosSTOP, Roche) followed by  
378 mild agitation at 4°C for 30 min and centrifugation at 20,000 g at 4°C for 30 min. Supernatant  
379 was collected as RIPA lysate.

380

### 381 **A $\beta$ 40, A $\beta$ 42, A $\beta$ oligomer, sAPP $\alpha$ , sAPP $\beta$ , CTF $\beta$ and TREM2 ELISA**

382 A $\beta$ 40 and A $\beta$ 42 levels in TBS, TBSX, and GND lysates were determined by ELISA as  
383 previously described (Shinohara, Petersen et al., 2013) using an end-specific A $\beta$  monoclonal  
384 antibody (13.1.1 for A $\beta$ 40 and 2.1.3 for A $\beta$ 42) and a HRP-conjugated detection antibody (Ab5,  
385 from Dr. Golde lab) (Chakrabarty, Li et al., 2018). A $\beta$ 42 in ISF was detected by commercial kits  
386 (Thermo Fisher, KHB3544). A $\beta$  oligomers in TBS and TBSX lysates were detected by  
387 commercial kits (Biosensis, BEK-2215-2P). sAPP $\alpha$ , sAPP $\beta$  in TBS lysates were detected by  
388 commercial kits (Meso Scale Discovery, K15120E-2). CTF $\beta$  in TBSX lysates was detected by  
389 commercial kit (IBL, 27776).

390 TREM2 in TBS lysate, TBSX lysate, serum, conditioned medium, and microglia RIPA lysates  
391 were measured as described (Kleinberger et al., 2017) with minor modification using the Meso  
392 Scale Discovery (MSD) platform. Streptavidin-coated 96-well plates (MSD, L55SA-2) were  
393 blocked overnight at 4°C in blocking buffer (3% bovine serum albumin and 0.05% Tween-20 in  
394 PBS). Capture antibody (R&D Systems, BAF1729, 0.25 ug/ml) was applied at RT for 1 hour.  
395 Samples were incubated overnight at 4°C with an established dilution in fresh-prepared sample  
396 buffer (1% bovine serum albumin and 0.05% Tween-20 in PBS) supplemented with protease  
397 inhibitor (cOmplete, Roche). Detection antibody (R&D Systems, MAB1729,) was applied at RT  
398 for 1 hour. Sulfo-tag labeled anti rat antibody (MSD, R32AH-5) was applied at RT for 1 hour,  
399 and final measurements were made with Read Buffer (MSD, R92TC-3). TBS lysate, TBSX  
400 lysate, and serum from Trem2-KO mice were used as negative controls.

401

#### 402 **Hippocampal LTP recordings and analyses**

403 Electrophysiological recordings were performed with littermates of *Trem2* H157Y homozygous  
404 mice and WT time at 6 months of age as previously described (Rogers, Liu et al., 2017) with  
405 minor modifications. Each mouse was acutely decapitated and the brain was dissected out to  
406 conduct transverse slicing in ice-cold cutting solution containing 110 mM sucrose, 60 mM NaCl,  
407 3 mM KCl, 1.25 mM NaH<sub>2</sub>PO<sub>4</sub>, 28 mM NaHCO<sub>3</sub>, 0.6 mM sodium ascorbate, 5 mM glucose, 7  
408 mM MgCl<sub>2</sub> and 0.5 mM CaCl<sub>2</sub>. Field excitatory post-synaptic potentials (fEPSPs) were obtained  
409 from area CA1 stratum radiatum with the use of a glass microelectrode (2 - 4 mΩ) filled with  
410 artificial cerebrospinal fluid (aCSF) containing 125 mM NaCl, 2.5 mM KCl, 1.25 mM NaH<sub>2</sub>PO<sub>4</sub>,  
411 25 mM NaHCO<sub>3</sub>, 25 mM glucose, 1 mM MgCl<sub>2</sub> and 2 mM CaCl<sub>2</sub>. fEPSPs were evoked  
412 through stimulation of the Schaffer collaterals using a 0.1 millisecond biphasic pulse delivered

413 every 20 seconds. After a consistent response to a voltage stimulus was established, threshold  
414 voltage for evoking fEPSPs was determined and the voltage was increased incrementally every  
415 0.5 - 1 mV until the maximum amplitude of the fEPSP was reached (I/O curve). All other  
416 stimulation paradigms were induced at the same voltage, defined as 50-60% of the stimulus  
417 voltage used to produce the maximum fEPSP amplitude, for each individual slice. Paired-pulse  
418 facilitation (PPF) was induced with two paired-pulses given with an initial delay of 20  
419 milliseconds and the time to the second pulse incrementally increased 20 milliseconds until a  
420 final delay of 300 milliseconds was reached. The fEPSP baseline response was then recorded for  
421 20 min. The tetanus used to evoke LTP was a theta-burst stimulation (TBS) protocol consisting  
422 of five trains of four pulse bursts at 200 Hz separated by 200 milliseconds, repeated six times  
423 with an inter-train interval of 10 seconds. Following TBS, fEPSPs were recorded for 60 min.

424 All analyses were performed by customized programming in MATLAB (R2019a). The  
425 fEPSP slope was calculated within the first 1 ms of the descending domain. I/O curve was  
426 presented as the fEPSP slope versus fiber volley amplitude responding to increasing stimulus  
427 intensities. PPF strength was examined by the ratio of the second fEPSP slope and first fEPSP  
428 slope for each stimulation pair. Potentiation was measured as the increase of the mean fEPSP  
429 slope in each minute following TBS normalized to the mean fEPSP descending slope of baseline  
430 recordings.

431

### 432 ***In vivo* microdialysis**

433 To assess the A $\beta$  clearance, we examine the A $\beta$  level in hippocampal interstitial fluid (ISF) by *in*  
434 *vivo* microdialysis in awake, free-moving mice as previously described (Cirrito et al., 2003, Liu  
435 et al., 2017). Animals were placed in a stereotaxic device equipped with dual manipulator arms

436 and an isoflurane anesthetic mask (David Kopf Instruments). Under isoflurane volatile anesthetic,  
437 guide cannula (BR style; Bioanalytical Systems) were cemented into the hippocampus (3.1 mm  
438 behind bregma, 2.5 mm lateral to midline, and 1.2 mm below dura at a 12° angle). Four to six  
439 hours post-surgery, a microdialysis probe (30-kilodalton MWCO membrane, Bioanalytical  
440 Systems) was inserted through the guide cannula into the brain. Artificial cerebrospinal fluid  
441 (aCSF) (mM: 1.3 CaCl<sub>2</sub>, 1.2 MgSO<sub>4</sub>, 3 KCl, 0.4 KH<sub>2</sub>PO<sub>4</sub>, 25 NaHCO<sub>3</sub>, and 122 NaCl, pH 7.4)  
442 containing 3% bovine serum albumin (BSA; Sigma) filtered through a 0.1 mm membrane was  
443 used as microdialysis perfusion buffer. Flow rate was a constant 1.0 ml/min. Samples were  
444 collected hourly into a refrigerated fraction collector. The baseline samples were collected for 10  
445 hours followed by subcutaneous administration of a  $\gamma$ -secretase inhibitor, LY411575 (5 mg/kg)  
446 to rapidly block the production of A $\beta$ . Samples were collected for another 4 hours after treatment.  
447 ISF A $\beta$ 42 in the 14 samples for each mouse was measured by ELISA (Invitrogen, KHB3441,  
448 1:4). To determine A $\beta$ 42 half-life (Cirrito et al., 2003), datapoints from drug delivery were  
449 analyzed. Meeting with the first-order processes, the elimination rate ( $Ke$ ) of A $\beta$ 42 is related to  
450 the slope ( $a$ ) of the semi-log plot of concentration versus time:  $a = -Ke/2.3$ . The half-life ( $T_{1/2}$ )  
451 of A $\beta$ 42 is further calculated as  $T_{1/2} = 0.693/Ke$ .

452

### 453 *Statistical analyses*

454 All data were reported as mean values  $\pm$  SEM unless. Generally, if sample sizes are larger than 7,  
455 to ensure that results were valid in the presence of non-normal distributions, or differing  
456 variances between groups, Kruskal-Wallis tests with uncorrected Dun's multiple comparisons or  
457 Wilcoxon Rank-sum tests were used. If the sample size  $\leq 7$  and dataset showed similar variances  
458 examined by F-test, unpaired  $t$  test was used since nonparametric tests would have very low

459 power. In Fig 4C, unpaired *t* test with Welch's correction (Welch's *t* test) was used because of  
460 the significant different variances. One-Way ANOCOVA with comparison of slopes was used in  
461 Fig 2A. All the statistical analyses were conducted using GraphPad Prism v8.4.3 except for Fig2  
462 in *MATLAB*. All statistical tests were two-sided. The statistical tests used for each analysis, the  
463 sample size and the significance levels are reported in the legend of each figure.

464

#### 465 **Acknowledgments**

466 This work was supported by NIH grants R01AG066395 (to G.B. and N.Z.), RF1AG056130,  
467 R37AG027924, and RF1AG046205 (to G.B).

468

#### 469 **Author contributions**

470 WQ, NZ and GB developed the research concept and designed the experiments; WQ, and YC  
471 prepared the animals and tissues, and performed most experiments including LTP recording and  
472 analysis, immunofluorescence staining/imaging/quantification, Western blotting, ELISA; YAM,  
473 WQ, and YC designed and performed primary microglia culture; JAK and C-CL performed the  
474 *in vivo* microdialysis; C-CL. coordinated the generation of *Trem2* mouse lines; KA, YC and WQ  
475 performed the behavioral tests and analysis; YC maintained the animal colonies and performed  
476 genotyping; KC and FL helped with animal tissue collection; FS helped with the image analysis;  
477 YAM and MD helped with ELISA; JF supervised the behavioral experiments; WQ, NZ and GB  
478 wrote the manuscript with critical inputs and edits by all the co-authors.

479

#### 480 **Conflict of interest**

481 GB consults for SciNeuro and Vida Ventures, had consulted for AbbVie, E-Scape, and Eisai, and  
482 serves as a Co-Editor-in-Chief for Molecular Neurodegeneration. All other authors declare no  
483 competing interests.

484

## 485 **References**

486 Atagi Y, Liu CC, Painter MM, Chen XF, Verbeeck C, Zheng H, Li X, Rademakers R, Kang SS, Xu H, Younkin S,  
487 Das P, Fryer JD, Bu G (2015) Apolipoprotein E Is a Ligand for Triggering Receptor Expressed on Myeloid  
488 Cells 2 (TREM2). *J Biol Chem* 290: 26043-50

489 Behringer R, Gertsenstein M, Nagy KV, Nagy A (2014) Manipulating the mouse embryo: a laboratory  
490 manual. Cold Spring Harbor Laboratory Press,

491 Benitez BA, Cruchaga C, United States-Spain Parkinson's Disease Research G (2013) TREM2 and  
492 neurodegenerative disease. *N Engl J Med* 369: 1567-8

493 Chakrabarty P, Li A, Ladd TB, Strickland MR, Koller EJ, Burgess JD, Funk CC, Cruz PE, Allen M, Yaroshenko  
494 M, Wang X, Younkin C, Reddy J, Lohrer B, Mehrke L, Moore BD, Liu X, Ceballos-Diaz C, Rosario AM,  
495 Medway C et al. (2018) TLR5 decoy receptor as a novel anti-amyloid therapeutic for Alzheimer's disease.  
496 *J Exp Med* 215: 2247-2264

497 Chen GF, Xu TH, Yan Y, Zhou YR, Jiang Y, Melcher K, Xu HE (2017) Amyloid beta: structure, biology and  
498 structure-based therapeutic development. *Acta Pharmacol Sin* 38: 1205-1235

499 Cheng Q, Danao J, Talreja S, Wen P, Yin J, Sun N, Li CM, Chui D, Tran D, Koirala S, Chen H, Foltz IN, Wang  
500 S, Sambashivan S (2018) TREM2-activating antibodies abrogate the negative pleiotropic effects of the  
501 Alzheimer's disease variant Trem2(R47H) on murine myeloid cell function. *J Biol Chem* 293: 12620-  
502 12633

503 Cirrito JR, May PC, O'Dell MA, Taylor JW, Parsadanian M, Cramer JW, Audia JE, Nissen JS, Bales KR, Paul  
504 SM, DeMattos RB, Holtzman DM (2003) In vivo assessment of brain interstitial fluid with microdialysis  
505 reveals plaque-associated changes in amyloid-beta metabolism and half-life. *J Neurosci* 23: 8844-53

506 DeTure MA, Dickson DW (2019) The neuropathological diagnosis of Alzheimer's disease. *Mol*  
507 *Neurodegener* 14: 32

508 Fassler M, Rappaport MS, Cuno CB, George J (2021) Engagement of TREM2 by a novel monoclonal  
509 antibody induces activation of microglia and improves cognitive function in Alzheimer's disease models.  
510 *J Neuroinflammation* 18: 19

511 Feuerbach D, Schindler P, Barske C, Joller S, Beng-Louka E, Worringer KA, Kommineni S, Kaykas A, Ho DJ,  
512 Ye C, Welzenbach K, Elain G, Klein L, Brzak I, Mir AK, Farady CJ, Aichholz R, Popp S, George N, Neumann  
513 U (2017) ADAM17 is the main sheddase for the generation of human triggering receptor expressed in  
514 myeloid cells (hTREM2) ectodomain and cleaves TREM2 after Histidine 157. *Neurosci Lett* 660: 109-114

515 Filipello F, Morini R, Corradini I, Zerbi V, Canzi A, Michalski B, Erreni M, Markicevic M, Starvaggi-Cucuzza  
516 C, Otero K, Piccio L, Cignarella F, Perrucci F, Tamborini M, Genua M, Rajendran L, Menna E, Vetrano S,  
517 Fahnstock M, Paolicelli RC et al. (2018) The Microglial Innate Immune Receptor TREM2 Is Required for  
518 Synapse Elimination and Normal Brain Connectivity. *Immunity* 48: 979-991 e8

519 Fuhrmann M, Bittner T, Jung CK, Burgold S, Page RM, Mitteregger G, Haass C, LaFerla FM, Kretschmar H,  
520 Herms J (2010) Microglial Cx3cr1 knockout prevents neuron loss in a mouse model of Alzheimer's  
521 disease. *Nat Neurosci* 13: 411-3

522 Guerreiro R, Wojtas A, Bras J, Carrasquillo M, Rogaeva E, Majounie E, Cruchaga C, Sassi C, Kauwe JS,  
523 Younkin S, Hazrati L, Collinge J, Pocock J, Lashley T, Williams J, Lambert JC, Amouyel P, Goate A,  
524 Rademakers R, Morgan K et al. (2013) TREM2 variants in Alzheimer's disease. *N Engl J Med* 368: 117-27  
525 Guo T, Zhang D, Zeng Y, Huang TY, Xu H, Zhao Y (2020) Molecular and cellular mechanisms underlying  
526 the pathogenesis of Alzheimer's disease. *Mol Neurodegener* 15: 40  
527 Haeussler M, Schonig K, Eckert H, Eschstruth A, Mianne J, Renaud JB, Schneider-Maunoury S,  
528 Shkumatava A, Teboul L, Kent J, Joly JS, Concordet JP (2016) Evaluation of off-target and on-target  
529 scoring algorithms and integration into the guide RNA selection tool CRISPOR. *Genome Biol* 17: 148  
530 Jadhav VS, Lin PBC, Pennington T, Di Prisco GV, Jannu AJ, Xu G, Moutinho M, Zhang J, Atwood BK,  
531 Puntambekar SS, Bissel SJ, Oblak AL, Landreth GE, Lamb BT (2020) Trem2 Y38C mutation and loss of  
532 Trem2 impairs neuronal synapses in adult mice. *Mol Neurodegener* 15: 62  
533 Jay TR, Hirsch AM, Broihier ML, Miller CM, Neilson LE, Ransohoff RM, Lamb BT, Landreth GE (2017)  
534 Disease Progression-Dependent Effects of TREM2 Deficiency in a Mouse Model of Alzheimer's Disease. *J*  
535 *Neurosci* 37: 637-647  
536 Jiang T, Tan L, Chen Q, Tan MS, Zhou JS, Zhu XC, Lu H, Wang HF, Zhang YD, Yu JT (2016) A rare coding  
537 variant in TREM2 increases risk for Alzheimer's disease in Han Chinese. *Neurobiol Aging* 42: 217 e1-3  
538 Jonsson T, Stefansson K (2013) TREM2 and neurodegenerative disease. *N Engl J Med* 369: 1568-9  
539 Kleinberger G, Yamanishi Y, Suarez-Calvet M, Czirr E, Lohmann E, Cuyvers E, Struyfs H, Pettkus N,  
540 Wenninger-Weinzierl A, Mazaheri F, Tahirovic S, Lleo A, Alcolea D, Fortea J, Willem M, Lammich S,  
541 Molinuevo JL, Sanchez-Valle R, Antonell A, Ramirez A et al. (2014) TREM2 mutations implicated in  
542 neurodegeneration impair cell surface transport and phagocytosis. *Sci Transl Med* 6: 243ra86  
543 Kober DL, Alexander-Brett JM, Karch CM, Cruchaga C, Colonna M, Holtzman MJ, Brett TJ (2016)  
544 Neurodegenerative disease mutations in TREM2 reveal a functional surface and distinct loss-of-function  
545 mechanisms. *Elife* 5  
546 Lessard CB, Malnik SL, Zhou Y, Ladd TB, Cruz PE, Ran Y, Mahan TE, Chakrabaty P, Holtzman DM, Ulrich JD,  
547 Colonna M, Golde TE (2018) High-affinity interactions and signal transduction between Abeta oligomers  
548 and TREM2. *EMBO Mol Med* 10  
549 Liu CC, Zhao N, Fu Y, Wang N, Linares C, Tsai CW, Bu G (2017) ApoE4 Accelerates Early Seeding of  
550 Amyloid Pathology. *Neuron* 96: 1024-1032 e3  
551 McDade E, Llibre-Guerra JJ, Holtzman DM, Morris JC, Bateman RJ (2021) The informed road map to  
552 prevention of Alzheimer Disease: A call to arms. *Mol Neurodegener* 16: 49  
553 Pease S, Saunders TL (2011) *Advanced Protocols for Animal Transgenesis: An ISTT Manual*, Springer  
554 *Protocols Handbooks*. Springer,  
555 Querfurth HW, LaFerla FM (2010) Alzheimer's disease. *N Engl J Med* 362: 329-44  
556 Ran FA, Hsu PD, Wright J, Agarwala V, Scott DA, Zhang F (2013) Genome engineering using the CRISPR-  
557 Cas9 system. *Nat Protoc* 8: 2281-2308  
558 Ren S, Yao W, Tambini MD, Yin T, Norris KA, D'Adamio L (2020) Microglia TREM2(R47H) Alzheimer-linked  
559 variant enhances excitatory transmission and reduces LTP via increased TNF-alpha levels. *Elife* 9  
560 Rogers JT, Liu CC, Zhao N, Wang J, Putzke T, Yang L, Shinohara M, Fryer JD, Kanekiyo T, Bu G (2017)  
561 Subacute ibuprofen treatment rescues the synaptic and cognitive deficits in advanced-aged mice.  
562 *Neurobiol Aging* 53: 112-121  
563 Schlepckow K, Kleinberger G, Fukumori A, Feederle R, Lichtenthaler SF, Steiner H, Haass C (2017) An  
564 Alzheimer-associated TREM2 variant occurs at the ADAM cleavage site and affects shedding and  
565 phagocytic function. *EMBO Mol Med* 9: 1356-1365  
566 Schlepckow K, Monroe KM, Kleinberger G, Cantuti-Castelvetri L, Parhizkar S, Xia D, Willem M, Werner G,  
567 Pettkus N, Brunner B, Sulzen A, Nuscher B, Hampel H, Xiang X, Feederle R, Tahirovic S, Park JI, Prorok R,  
568 Mahon C, Liang CC et al. (2020) Enhancing protective microglial activities with a dual function TREM2  
569 antibody to the stalk region. *EMBO Mol Med* 12: e11227

570 Sims R, van der Lee SJ, Naj AC, Bellenguez C, Badarinarayan N, Jakobsdottir J, Kunkle BW, Boland A,  
571 Raybould R, Bis JC, Martin ER, Grenier-Boley B, Heilmann-Heimbach S, Chouraki V, Kuzma AB, Sleegers K,  
572 Vronskaya M, Ruiz A, Graham RR, Oulas R et al. (2017) Rare coding variants in PLCG2, ABI3, and TREM2  
573 implicate microglial-mediated innate immunity in Alzheimer's disease. *Nat Genet* 49: 1373-1384  
574 Song W, Hooli B, Mullin K, Jin SC, Cella M, Ulland TK, Wang Y, Tanzi RE, Colonna M (2017) Alzheimer's  
575 disease-associated TREM2 variants exhibit either decreased or increased ligand-dependent activation.  
576 *Alzheimers Dement* 13: 381-387  
577 Song WM, Joshita S, Zhou Y, Ulland TK, Gilfillan S, Colonna M (2018) Humanized TREM2 mice reveal  
578 microglia-intrinsic and -extrinsic effects of R47H polymorphism. *J Exp Med* 215: 745-760  
579 Thornton P, Sevalle J, Deery MJ, Fraser G, Zhou Y, Stahl S, Franssen EH, Dodd RB, Qamar S, Gomez Perez-  
580 Nieves B, Nicol LS, Eketjall S, Revell J, Jones C, Billinton A, St George-Hyslop PH, Chessell I, Crowther DC  
581 (2017) TREM2 shedding by cleavage at the H157-S158 bond is accelerated for the Alzheimer's disease-  
582 associated H157Y variant. *EMBO Mol Med* 9: 1366-1378  
583 Ulland TK, Colonna M (2018) TREM2 - a key player in microglial biology and Alzheimer disease. *Nat Rev*  
584 *Neurol* 14: 667-675  
585 Ulrich JD, Ulland TK, Mahan TE, Nystrom S, Nilsson KP, Song WM, Zhou Y, Reinartz M, Choi S, Jiang H,  
586 Stewart FR, Anderson E, Wang Y, Colonna M, Holtzman DM (2018) ApoE facilitates the microglial  
587 response to amyloid plaque pathology. *J Exp Med* 215: 1047-1058  
588 Vilalta A, Zhou Y, Sevalle J, Griffin JK, Satoh K, Allendorf DH, De S, Puigdellivol M, Bruzas A, Burguillos MA,  
589 Dodd RB, Chen F, Zhang Y, Flagmeier P, Needham LM, Enomoto M, Qamar S, Henderson J, Walter J,  
590 Fraser PE et al. (2021) Wild-type sTREM2 blocks Abeta aggregation and neurotoxicity, but the  
591 Alzheimer's R47H mutant increases Abeta aggregation. *J Biol Chem* 296: 100631  
592 Walsh DM, Klyubin I, Fadeeva JV, Cullen WK, Anwyl R, Wolfe MS, Rowan MJ, Selkoe DJ (2002) Naturally  
593 secreted oligomers of amyloid beta protein potently inhibit hippocampal long-term potentiation in vivo.  
594 *Nature* 416: 535-9  
595 Wang S, Mustafa M, Yuede CM, Salazar SV, Kong P, Long H, Ward M, Siddiqui O, Paul R, Gilfillan S,  
596 Ibrahim A, Rhinn H, Tassi I, Rosenthal A, Schwabe T, Colonna M (2020) Anti-human TREM2 induces  
597 microglia proliferation and reduces pathology in an Alzheimer's disease model. *J Exp Med* 217  
598 Wang Y, Cella M, Mallinson K, Ulrich JD, Young KL, Robinette ML, Gilfillan S, Krishnan GM, Sudhakar S,  
599 Zinselmeier BH, Holtzman DM, Cirrito JR, Colonna M (2015) TREM2 lipid sensing sustains the microglial  
600 response in an Alzheimer's disease model. *Cell* 160: 1061-71  
601 Wei W, Nguyen LN, Kessels HW, Hagiwara H, Sisodia S, Malinow R (2010) Amyloid beta from axons and  
602 dendrites reduces local spine number and plasticity. *Nat Neurosci* 13: 190-6  
603 Yeh FL, Wang Y, Tom I, Gonzalez LC, Sheng M (2016) TREM2 Binds to Apolipoproteins, Including APOE  
604 and CLU/APOJ, and Thereby Facilitates Uptake of Amyloid-Beta by Microglia. *Neuron* 91: 328-40  
605 Yin J, Liu X, He Q, Zhou L, Yuan Z, Zhao S (2016) Vps35-dependent recycling of Trem2 regulates microglial  
606 function. *Traffic* 17: 1286-1296  
607 Yuan P, Condello C, Keene CD, Wang Y, Bird TD, Paul SM, Luo W, Colonna M, Baddeley D, Grutzendler J  
608 (2016) TREM2 Haplodeficiency in Mice and Humans Impairs the Microglia Barrier Function Leading to  
609 Decreased Amyloid Compaction and Severe Axonal Dystrophy. *Neuron* 92: 252-264  
610 Zhao Y, Wu X, Li X, Jiang LL, Gui X, Liu Y, Sun Y, Zhu B, Pina-Crespo JC, Zhang M, Zhang N, Chen X, Bu G,  
611 An Z, Huang TY, Xu H (2018) TREM2 Is a Receptor for beta-Amyloid that Mediates Microglial Function.  
612 *Neuron* 97: 1023-1031 e7  
613 Zhong L, Wang Z, Wang D, Wang Z, Martens YA, Wu L, Xu Y, Wang K, Li J, Huang R, Can D, Xu H, Bu G,  
614 Chen XF (2018) Amyloid-beta modulates microglial responses by binding to the triggering receptor  
615 expressed on myeloid cells 2 (TREM2). *Mol Neurodegener* 13: 15  
616 Zhong L, Xu Y, Zhuo R, Wang T, Wang K, Huang R, Wang D, Gao Y, Zhu Y, Sheng X, Chen K, Wang N, Zhu L,  
617 Can D, Marten Y, Shinohara M, Liu CC, Du D, Sun H, Wen L et al. (2019) Soluble TREM2 ameliorates



618 pathological phenotypes by modulating microglial functions in an Alzheimer's disease model. Nat  
619 Commun 10: 1365

## 620 **Figure legends**

### 621 **Figure 1. *Trem2* H157Y mutation increases sTrem2.**

622 A Schematic illustration of sTrem2 generation.

623 B *Trem2* H157Y knock-in mice were generated by introducing a C>T mutation (bold  
624 orange) via CRIPR-Cas9. Protospacer region recognized by guide RNA (gRNA) is shown in  
625 orange. Protospacer adjacent region (PAM) is shown in green.

626 C *Trem2* mRNA level was examined in the cortex of mice at 6 months of age. N =11-14  
627 mice per genotype, mixed sex.

628

629 D-E TREM2 level was examined by ELISA in cortical extracts obtained by sequential protein  
630 extraction with TBS (C) and TBSX(D) from mice at 6 months of age. N =11-14 mice per  
631 genotype, mixed sex.

632 F-G TREM2 level was examined by ELISA in conditioned medium (CM) (E) and RIPA  
633 lysates (F) of primary microglia (MG). TREM2 amount was normalized to the total protein level  
634 of cell lysates followed by another normalization to the values of WT littermates. N=8-11 pups  
635 per genotype.

636 H TREM2 level in the serum of mice at 6 months of age was examined by ELISA. N =11-  
637 14 mice per genotype, mixed sex.

638 Data information: Data are presented as Mean±SEM. Kruskal-Wallis tests with uncorrected  
639 Dun's multiple comparisons were used in C-H. N.S., not significant. \* p<0.05. \*\*p<0.01.

640

### 641 **Figure 2. *Trem2* H157Y mutation enhances synaptic plasticity**

642 A The input-output curves for WT and Hom mice at 6 months of age are shown as linear  
643 regressions of fEPSP slopes in response to pre-synaptic fiber volley amplitudes. n = 13 brain  
644 slices from 6-7 male mice/group.

645 B Paired-pulse facilitation (PPF) profiles were achieved with increased inter-pulse intervals  
646 (IPI) are shown. n = 11-14 brain slices from 6-7 male mice/group.

647 C-D Theta-Burst Stimulus (TBS) induced LTP profiles for WT and Hom mice are shown as  
648 averaged and normalized fEPSP slopes (C). Example recording traces before and after TBS  
649 stimulation are shown. The averages fEPSP slope in the last five minutes are compared between  
650 groups (D). n = 12 brain slices from 6-7 male mice/group.

651 Data information: Data are presented as Mean $\pm$ SEM. One-Way ANOCOVA with comparison of  
652 slopes was used in A. Wilcoxon Rank-sum tests were used in B. Unpaired t test was used in D.  
653 N.S., not significant. \*p < 0.05.

654

655 **Figure 3. *Trem2* H157Y mutation leads to reduction in amyloid in 5xFAD mice.**

656 A Representative images of amyloid staining are shown for 5xFAD/WT, 5xFAD/Het, and  
657 5xFAD/Hom mice at the age of 8.5 months of age. Scale, 400  $\mu$ m.

658 B-C Amyloid plaque number (B) and size (C) are quantified for each genotype from mice at  
659 the age of 8.5 months of age. N = 19-24 mice per genotype, mixed sex.

660 D-E A $\beta$ 40 (D) and A $\beta$ 42 (E) are measured by ELISA in cortical guanidine lysates (GND) for  
661 each genotype. N = 19-24 mice per genotype, mixed sex.

662 F-G A $\beta$ 40 (F) and A $\beta$ 42 (G) are measured by ELISA in cortical guanidine lysates (GND) for  
663 each genotype from Founder 2# offspring. N = 8-13 mice per genotype, mixed sex.

664 H-I A $\beta$  oligomer is measured by ELISA in cortical extracts obtained sequentially by TBS (H)  
665 and TBSX (I) buffer. N =19-24 mice per genotype, mixed sex.

666 Data information: Data are presented as Mean $\pm$ SEM. Kruskal-Wallis tests with uncorrected  
667 Dun's multiple comparisons were used in B- I. N.S., not significant. \* p<0.05. \*\*p<0.01.

668

669 **Figure 4. *Trem2* H157Y mutation accelerates the A $\beta$  clearance in 5xFAD mice.**

670 A A $\beta$ 42 level is quantified by ELISA in the interstitial fluid (ISF) obtained in microdialysis  
671 experiments with WT and Hom mice at 3 months of age. N = 6-7 mice per genotype, mixed sex.

672 At time 0,  $\gamma$ -secretase inhibitor LY411575 was administrated to stop the A $\beta$  production.

673 B Semilog plot is performed from time 0 to analyze the half-life of A $\beta$ 42 clearance.

674 C Half-life is quantified and plotted in WT and Hom group with a normalization to WT. N  
675 = 6-7 mice per genotype, mixed sex.

676 Data information: Data are presented as Mean $\pm$ SEM. Unpaired *t* tests were used in B. Welch's *t*  
677 test was used in C. N.S., not significant. \* p<0.05. \*\*p<0.01.

678

679

680 **Figure 5. *Trem2* H157Y mutation reduces microgliosis in 5xFAD mice.**

681 A Representative images of IBA1 staining are shown for 5xFAD/WT, 5xFAD/Het, and  
682 5xFAD/Hom mice at 8.5 months of age. Scale, 400  $\mu$ m.

683 B IBA1 immuno-reactivity is quantified for each genotype at the age of 8.5 months of age.  
684 N =19-24 mice per genotype, mixed sex.

685 C Correlation analysis between IBA1 signals (area %) and A $\beta$ 42 in GND lysates with R2  
686 and p value shown. N =19-24 mice per genotype, mixed sex.

687 D Representative images of CD68 staining are shown for 5xFAD/WT, 5xFAD/Het, and  
688 5xFAD/Hom mice at the age of 8.5 months of age. Scale, 400  $\mu$ m.

689 E CD68 immuno-reactivity is quantified for each genotype at the age of 8.5 months of age.  
690 N =19-24 mice per genotype, mixed sex.

691 F Correlation analysis between CD68 signals (area %) and A $\beta$ 42 in GND lysates with R2  
692 and p value shown above. N =19-24 mice per genotype, mixed sex.

693 G Representative confocal images of IBA1 and X34 co-staining are shown for 5xFAD/WT  
694 and 5xFAD/Hom mice at the age of 8.5 months of age. Scale, 10  $\mu$ m.

695 H Microglia cell body number surrounding X34 signal is counted within a radius of 30  $\mu$ m  
696 for each genotype at the age of 8.5 months of age. N = 4 mice per genotype, n = 32-69  
697 plaques/mouse.

698 I Plaque area (X34) coverage by microglia (MG) (IBA1) is quantified for each genotype at  
699 the age of 8.5 months of age. N = 4 mice per genotype, n = 32-69 plaques/mouse.

700 J Each plaque size is quantified for each genotype at the age of 8.5 months of age. N = 4  
701 mice per genotype, n = 32-69 plaques/mouse.

702 Data information: Data are presented as Mean $\pm$ SEM. Kruskal-Wallis tests with uncorrected  
703 Dun's multiple comparisons were used in B and E. Wilcoxon Rank-sum tests were used in H-J.

704 N.S., not significant, \* p<0.05. \*\*\*\*p<0.0001.

705

## 706 **Expanded View Figure legends**

### 707 **Figure EV1. Analysis of potential off target effects in the *Trem2* H157Y knock-in mice.**

708 A Top three putative off targets (A) with Cutting Frequency Determination (CFD) Score  
709 ranging from 0.25 to 0.44 were identified and sequenced with primers accordingly.

710 B Single peaks were seen at the putative sites (arrowhead), while two signals were seen at  
711 the Trem2 H157Y target site (highlighted with red, arrowhead). Orange arrows indicate the  
712 putative region and direction recognized by gRNA.

713

714 **Figure EV2. Trem2 H157Y mutation does not affect microglia density and morphology.**

715 A Representative images of IBA1 staining are shown for WT, Het, and Hom mice at 6  
716 months of age. Scale, 400  $\mu$ m.

717 B-C Cortical microglia (MG) number (B) and cell body size (C) are quantified in Image J for  
718 each genotype at 6 months of age. N =11-14 mice per genotype, mixed sex.

719 D-F Representative confocal images (D) of IBA1 staining were processed (E) and  
720 skeletonized (F) in image J for each genotype at 6 months of age. Scale bar for A and B, 50  $\mu$ m;  
721 Scale bar for C 10  $\mu$ m.

722 G-I The branch number (G), junction number (H), and total branch length per microglia (MG)  
723 (I) were assessed for each genotype at 6 months of age. N = 9-10 mice per genotype, mixed sex.

724 Data information: Data are presented as Mean $\pm$ SEM. Kruskal-Wallis tests with uncorrected  
725 Dun's multiple comparisons were used were used in B-C, G-I. N.S., not significant.

726

727 **Figure EV3. Trem2 H157Y mutation does not affect anxiety, working memory and**  
728 **associative memory.**

729 A Open field analysis (OFA) was conducted to examine the anxiety of mice with different  
730 genotypes at 6 months of age. N =37-40 mice per genotype, mixed sex.

731 B Y-maze spontaneous alteration test was conducted to examine the working memory of  
732 mice with different genotypes at 6 months of age. N =23-26 mice per genotype, mixed sex.

733 C Contextual fear conditioning test (CFC) was conducted to examine the associative  
734 memory of mice with different genotypes at 6 months of age. N =37-40 mice per genotype,  
735 mixed sex.

736 D Cued fear conditioning test (CFC) was conducted to examine the associative memory of  
737 mice with different genotypes at 6 months of age. N =37-40 mice per genotype, mixed sex.

738 Data information: Data are presented as Mean±SEM. Kruskal-Wallis tests with uncorrected  
739 Dun's multiple comparisons were used in A-D. N.S., not significant.

740

741 **Figure EV4. Effects of *Trem2* H157Y mutation on A $\beta$  levels, neuronal dystrophy**

742 A Representative images of fibrillar amyloid staining with X34 are shown for 5xFAD/WT,  
743 5xFAD/Het, and 5xFAD/Hom mice at 8.5 months of age. Scale, 400  $\mu$ m.

744 B-C plaque number (B) and size (C) are quantified for each genotype at 8.5 months of age. N  
745 =19-24 mice per genotype, mixed sex.

746 D-E A $\beta$ 40 is quantified by ELISA in cortical TBS (A) and TBSX (B) lysates of mice at 8.5  
747 months of age. N = 19-24 mice per genotype, mixed sex.

748 F-G A $\beta$ 42 is quantified by ELISA in cortical TBS (C) and TBSX (D) lysates of mice at 8.5  
749 months of age. N = 19-24 mice per genotype, mixed sex.

750 H-I A $\beta$ 40 is quantified by ELISA in cortical TBS (A) and TBSX (B) lysates of mice from  
751 Founder 2# at 8.5 months of age. N = 8-13 mice per genotype, mixed sex.

752 J-K A $\beta$ 42 is quantified by ELISA in cortical TBS (A) and TBSX (B) lysates of mice from  
753 Founder 2# at 8.5 months of age. N = 8-13 mice per genotype, mixed sex.

754 L Representative images of LAMP1 staining are shown for 5xFAD/WT, 5xFAD/Het, and  
755 5xFAD/Hom at the age of 8.5 months of age. Scale, 400  $\mu$ m.

756 M LAMP1 immuno-reactivity was quantified for each genotype at the age of 8.5 months of  
757 age. N =19-24 mice per genotype, mixed sex.

758 Data information: Data are presented as Mean±SEM. Kruskal-Wallis tests with uncorrected  
759 Dun's multiple comparisons were used in B-K and M. N.S., not significant. \* p<0.05.

760

761 **Figure EV5. *Trem2* H157Y mutation does not affect APP processing.**

762 A-B Soluble APP $\alpha$  (sAPP $\alpha$ , I), Soluble APP $\beta$  (sAPP $\beta$ , J) were examined, quantified, and  
763 normalized to 5xFAD/WT in TBS lysates of mice at 8.5 months of age. N = 19-24 mice per  
764 genotype, mixed sex.

765 C CTF $\beta$  was examined, quantified, and normalized to 5xFAD/WT in TBSX lysates of mice  
766 at 8.5 months of age. N = 19-24 mice per genotype, mixed sex.

767 Data information: Data are presented as Mean±SEM. Kruskal-Wallis tests with uncorrected  
768 Dun's multiple comparisons were used in A-C. N.S., not significant.

769

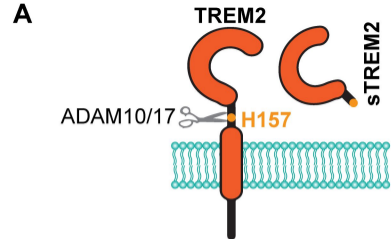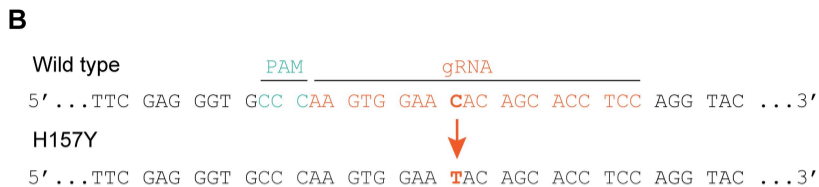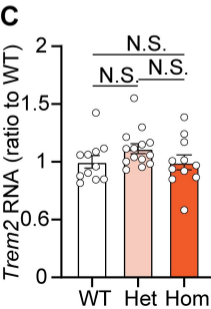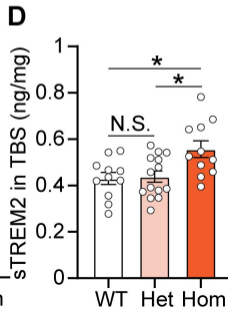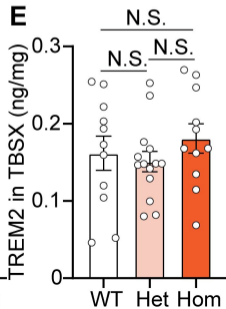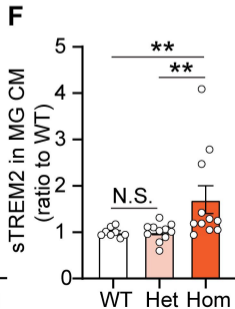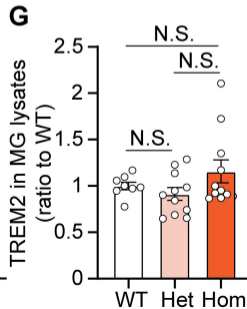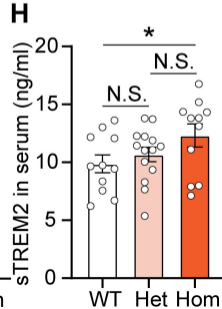



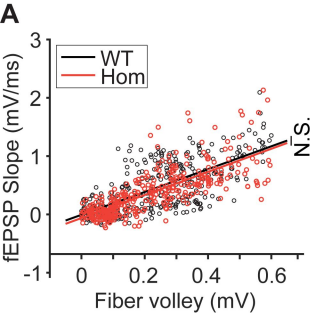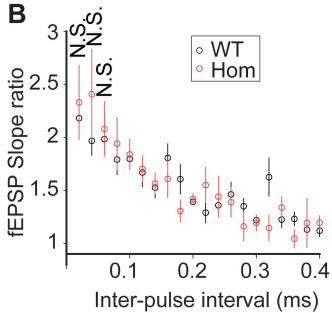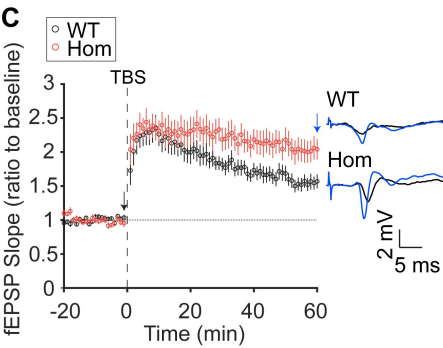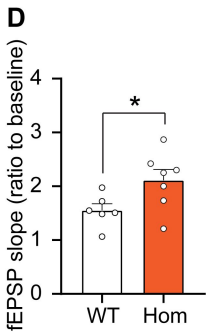

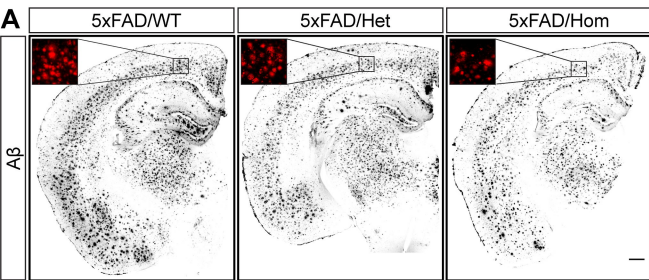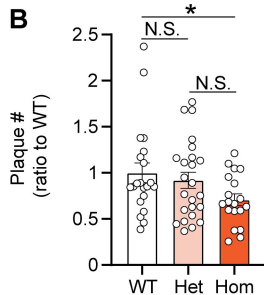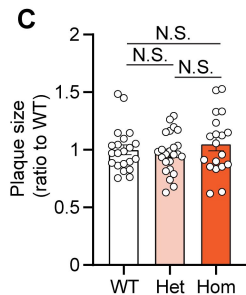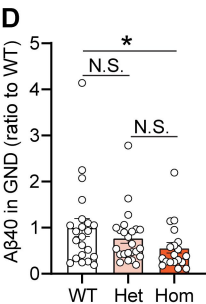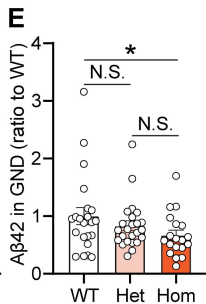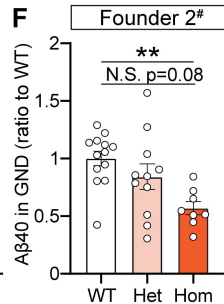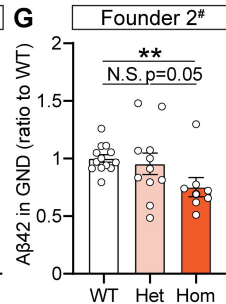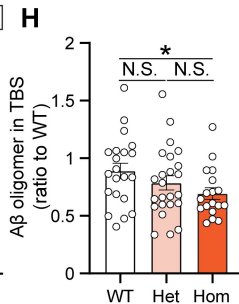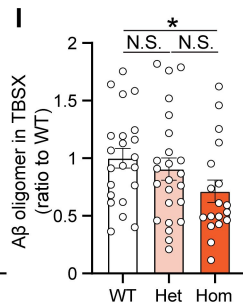

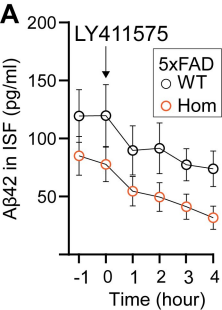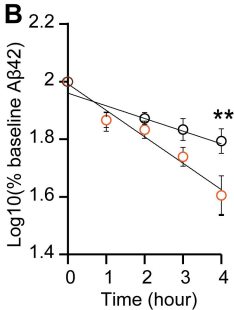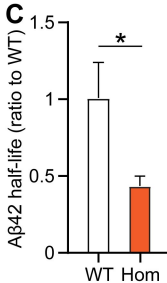

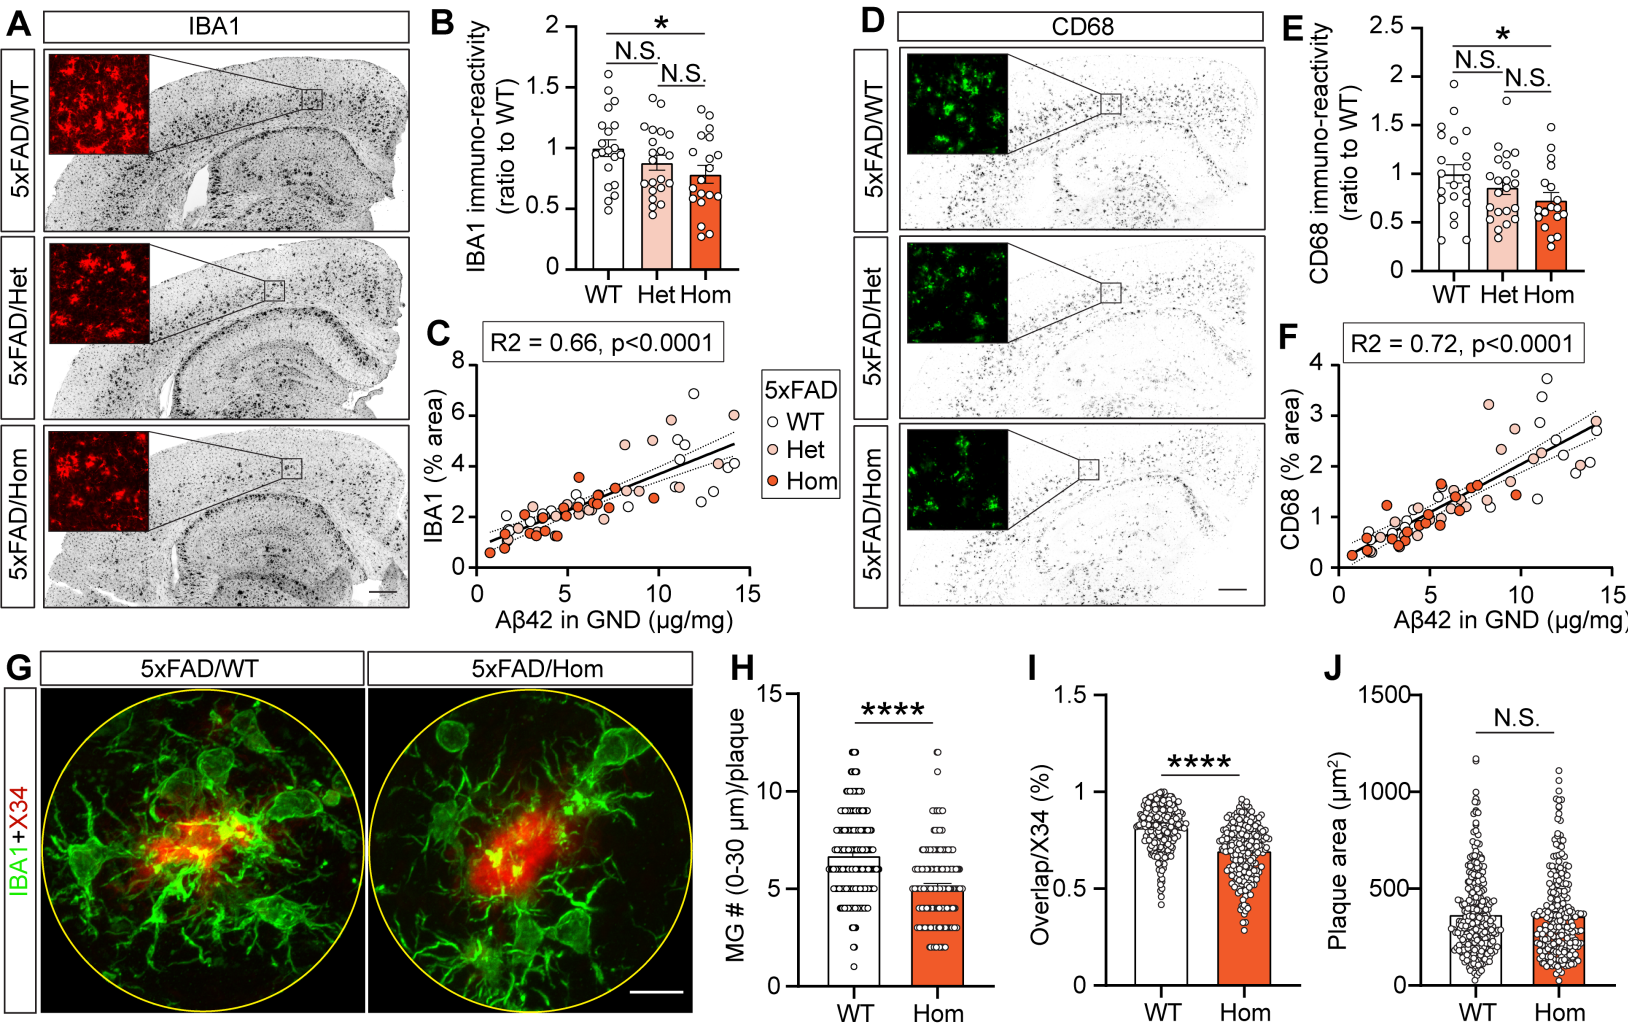

Source: https://www.biorxiv.org/content/biorxiv/early/2021/10/04/2021.10.04.463020.full.pdf
